# Supplementary material for: First principles characterisation of bio–nano interface
Source: Royal Society of Chemistry journal article supplement (doi:10.1039/d1cp01116b), 2021-01-01
Supplement: d1cp01116b2.xlsx [file d1cp01116b2.xlsx]

## Sheet: TiO2_NP_Descriptors_40proteins_
Material	Shape	Radius [nm]	Surface Area [nm^2]	Volume [nm^3]	Zeta potential [mV]	E_1BKZ [kJ/mol]	E_1BUO [kJ/mol]	E_1CS8 [kJ/mol]	E_1D3K [kJ/mol]	E_1DGF [kJ/mol]	E_1ET1 [kJ/mol]	E_1GQV [kJ/mol]	E_1HUP [kJ/mol]	E_1ILK [kJ/mol]	E_1KTH [kJ/mol]	E_1L9L [kJ/mol]	E_1LUG [kJ/mol]	E_1R6J [kJ/mol]	E_1REX [kJ/mol]	E_1XMK [kJ/mol]	E_2FMA [kJ/mol]	E_2IIY [kJ/mol]	E_2NLS [kJ/mol]	E_2O9S [kJ/mol]	E_2PPN [kJ/mol]	E_2QX6 [kJ/mol]	E_3DBZ [kJ/mol]	E_3HFW [kJ/mol]	E_3HHB [kJ/mol]	E_3HM3 [kJ/mol]	E_3UI4 [kJ/mol]	E_3ZSK [kJ/mol]	E_4EWZ [kJ/mol]	E_4F5S [kJ/mol]	E_4K2C [kJ/mol]	E_4OO4 [kJ/mol]	E_4XDX [kJ/mol]	E_5EXQ [kJ/mol]	E_5HVW [kJ/mol]	E_5IBN [kJ/mol]	E_5LHW [kJ/mol]	E_5U3A [kJ/mol]	E_6IIP [kJ/mol]	E_6S2S [kJ/mol]	E_6S9Z [kJ/mol]
anatase101	sphere	5	314.159	523.599	-50	-43.9011	-47.0431	-42.0608	-38.4532	-52.7832	-26.0882	-17.9438	-27.3773	-31.7691	-23.7479	-34.4906	-36.7784	-11.1697	-33.1085	-27.69	-24.229	-23.7717	-13.5213	-17.6428	-32.0814	-47.6303	-13.281	-59.9124	-31.5889	-44.218	-31.2165	-39.0248	-17.8792	-37.9456	-33.3278	-29.973	-48.0615	-68.6118	-32.5471	-38.6627	-11.4645	-35.4317	-35.0499	-44.0205	-37.6142
anatase101	sphere	5	314.159	523.599	-25	-42.0642	-51.8418	-45.1204	-43.4694	-55.3032	-23.7963	-14.5771	-30.8273	-29.9986	-23.8605	-28.2734	-36.5289	-10.4015	-31.9764	-27.3686	-25.0863	-26.3729	-12.8166	-20.1814	-30.6888	-46.8561	-16.548	-61.1269	-31.084	-45.2895	-30.3006	-37.6488	-18.1828	-40.2666	-35.0965	-36.6094	-47.4898	-65.2736	-32.5599	-35.9654	-11.4013	-36.2704	-31.009	-42.6918	-40.7867
anatase101	sphere	5	314.159	523.599	0	-41.106	-56.0407	-48.6968	-44.7127	-57.619	-21.8171	-11.9485	-34.4644	-28.4758	-24.071	-23.3906	-42.4578	-9.72244	-31.2654	-28.7956	-25.9001	-29.1863	-12.1864	-23.8776	-31.4896	-47.206	-20.1776	-61.8408	-31.5877	-49.2932	-29.4112	-35.5957	-18.4348	-42.944	-39.4016	-43.5569	-46.8913	-61.2818	-33.2874	-34.1922	-11.3755	-37.3026	-31.232	-41.2532	-41.5521
anatase101	sphere	5	314.159	523.599	25	-39.5341	-60.5909	-52.0922	-48.8378	-59.1951	-19.5604	-8.84578	-37.8932	-27.4617	-24.3282	-22.9712	-44.4286	-9.14849	-30.3968	-29.0168	-26.6427	-31.8901	-11.5012	-27.5488	-33.3629	-48.7727	-24.2061	-63.4399	-32.3983	-51.1097	-28.6125	-34.0929	-18.7525	-46.8381	-40.8449	-50.2866	-45.3963	-58.1875	-35.0924	-32.5349	-11.312	-38.2464	-32.7151	-39.8065	-44.6466
anatase101	sphere	5	314.159	523.599	50	-37.8825	-64.688	-55.566	-52.5699	-60.6953	-17.2143	-6.43495	-41.5681	-26.4315	-24.6954	-24.0696	-43.4462	-8.83225	-29.6579	-30.7123	-27.6513	-34.2917	-10.9391	-30.7214	-36.335	-49.1782	-27.0103	-64.4282	-34.5938	-53.4225	-27.9406	-32.554	-19.0447	-49.9573	-42.0898	-56.2988	-44.5359	-53.945	-37.1067	-31.5928	-11.3085	-39.451	-33.8869	-38.3777	-46.9449
anatase101	sphere	10	1256.64	4188.79	-50	-54.5822	-58.1531	-52.2807	-46.8502	-55.2136	-27.9275	-22.6532	-34.034	-33.6831	-29.1034	-41.141	-44.7283	-13.6238	-39.9229	-32.6399	-28.1563	-34.4119	-16.3242	-20.5727	-40.7537	-61.6905	-26.9047	-76.9668	-39.2006	-52.8917	-37.4074	-44.2067	-22.1508	-41.1203	-45.2558	-36.986	-53.7435	-88.9227	-41.2478	-46.0161	-15.1323	-46.8038	-45.5308	-53.4509	-48.3121
anatase101	sphere	10	1256.64	4188.79	-25	-54.9369	-64.2631	-56.4855	-48.3113	-53.6239	-25.8088	-19.6993	-38.1932	-33.0785	-29.1303	-34.1585	-43.6179	-12.7909	-38.6614	-30.921	-28.8666	-38.0031	-15.4336	-24.4185	-37.118	-61.7374	-28.6672	-77.1166	-37.9521	-54.5795	-36.4531	-42.3145	-22.3832	-45.3751	-47.3011	-38.5801	-52.9205	-86.457	-41.2731	-42.9396	-15.0578	-47.6275	-38.6114	-51.7906	-51.6614
anatase101	sphere	10	1256.64	4188.79	0	-51.9538	-68.6805	-60.0383	-50.6464	-52.5723	-23.5565	-16.5616	-41.7328	-32.5509	-29.1258	-28.3597	-46.1654	-12.0021	-37.9214	-29.3078	-29.7917	-39.9064	-14.6752	-28.2219	-36.6933	-61.7936	-34.0557	-77.3024	-37.6602	-59.6039	-35.359	-40.485	-22.6927	-51.5098	-53.1379	-41.4993	-52.9148	-83.6208	-42.0358	-40.0276	-14.9254	-48.2921	-36.948	-49.7202	-51.2917
anatase101	sphere	10	1256.64	4188.79	25	-49.4914	-72.1889	-64.7352	-52.2583	-51.3925	-21.3119	-13.577	-45.5065	-32.1248	-29.4193	-27.6647	-48.7369	-11.3817	-37.3261	-28.296	-30.4329	-43.1674	-13.9512	-30.9505	-37.5242	-60.7768	-43.1197	-78.1472	-37.8411	-62.2086	-34.342	-39.3958	-22.9179	-57.898	-60.9468	-47.4743	-51.7402	-79.77	-43.4023	-38.2117	-14.8399	-49.3539	-38.7454	-47.8559	-54.3424
anatase101	sphere	10	1256.64	4188.79	50	-48.738	-77.6114	-68.6357	-54.8096	-51.1999	-18.6765	-10.7484	-48.4203	-32.7521	-29.9756	-28.6579	-49.0906	-10.9481	-36.5031	-27.8051	-31.4718	-45.8752	-13.293	-33.3112	-41.0856	-62.5645	-42.6559	-78.9475	-39.4685	-63.6964	-33.0494	-38.2339	-23.2598	-62.8415	-66.9781	-55.5696	-50.9547	-78.478	-45.3785	-36.5845	-14.8071	-50.31	-40.4824	-45.9357	-55.0169
anatase101	sphere	15	2827.43	14137.2	-50	-57.2555	-60.9979	-57.0052	-49.0041	-60.617	-22.515	-24.8828	-38.473	-36.2139	-31.2847	-43.4126	-47.608	-14.6345	-42.222	-35.2273	-29.4971	-39.0995	-17.3182	-21.6555	-43.8536	-60.9087	-42.806	-79.1607	-43.9589	-58.0966	-40.0068	-45.6738	-23.8478	-46.972	-55.2298	-40.5351	-55.8644	-88.6195	-44.2175	-49.873	-16.4367	-52.5942	-50.4339	-56.4771	-49.7263
anatase101	sphere	15	2827.43	14137.2	-25	-56.2343	-65.1339	-60.4339	-51.9153	-58.2069	-20.387	-22.0276	-42.5945	-36.0342	-31.185	-36.7092	-46.1422	-13.8011	-41.1187	-33.42	-30.2196	-42.2666	-16.4367	-25.5092	-41.5849	-59.6811	-51.3777	-79.8558	-42.8791	-60.8857	-38.7918	-42.9915	-24.0986	-49.8911	-61.0068	-42.5332	-55.3145	-85.4389	-43.6886	-46.3239	-16.3057	-53.4472	-42.9529	-54.3967	-53.841
anatase101	sphere	15	2827.43	14137.2	0	-55.8798	-70.4401	-63.3417	-53.8159	-56.6157	-17.767	-18.7425	-46.0405	-35.1667	-31.3631	-30.55	-46.8288	-12.933	-40.1234	-31.4967	-30.808	-44.89	-15.5624	-28.4504	-38.9627	-60.43	-55.142	-81.1631	-41.7039	-65.2037	-37.647	-42.0649	-24.2743	-54.7461	-65.6704	-43.5451	-53.7044	-82.4506	-43.8004	-43.1225	-16.2491	-54.4789	-40.6399	-52.463	-55.5089
anatase101	sphere	15	2827.43	14137.2	25	-53.3152	-75.2416	-67.2679	-56.2804	-55.8444	-15.2507	-15.8428	-49.3567	-34.7822	-31.2795	-29.5528	-48.1416	-12.2924	-39.6758	-30.2188	-31.9458	-46.0866	-14.8229	-32.0172	-39.0273	-60.8785	-60.6799	-80.8813	-40.9399	-65.3559	-36.6889	-41.2566	-24.5845	-60.4971	-71.6831	-47.355	-52.5821	-78.4014	-45.0098	-40.2711	-16.1396	-55.1701	-42.5161	-49.6628	-57.2926
anatase101	sphere	15	2827.43	14137.2	50	-51.3946	-80.0243	-70.3308	-58.9096	-53.8627	-12.7269	-12.8416	-53.3273	-34.6409	-31.9814	-30.3307	-49.5425	-11.653	-38.5393	-28.9785	-32.7892	-49.4312	-14.1524	-35.8127	-40.3394	-62.2396	-68.9386	-80.4856	-40.7065	-69.9319	-35.3196	-39.744	-24.9217	-66.7869	-77.6927	-54.5129	-52.0026	-76.3298	-46.5927	-37.2179	-16.0778	-55.835	-44.626	-47.8858	-59.0607
anatase101	sphere	20	5026.55	33510.3	-50	-58.3551	-58.2187	-58.5456	-50.9566	-67.8199	-21.125	-26.0238	-40.6739	-38.7466	-32.4242	-44.8455	-50.2876	-15.1481	-43.2231	-36.229	-30.1661	-40.9495	-17.8067	-22.4941	-47.843	-63.8152	-33.4994	-78.3253	-47.3272	-61.9259	-41.3382	-46.2898	-24.7609	-51.26	-60.9274	-42.5678	-56.4889	-89.0438	-43.8476	-51.5721	-17.1775	-54.9544	-53.8878	-56.8476	-48.9649
anatase101	sphere	20	5026.55	33510.3	-25	-58.2759	-62.2861	-62.3126	-53.4276	-65.2597	-18.7371	-23.0004	-44.7692	-38.1545	-32.1726	-37.4364	-49.3987	-14.2616	-42.2426	-34.3424	-30.6966	-44.6507	-16.9107	-25.934	-44.1424	-63.1717	-41.5022	-80.498	-45.2941	-64.4461	-40.2481	-43.5316	-24.9695	-54.073	-65.8627	-44.3737	-54.8638	-84.8523	-43.0053	-48.5192	-17.0304	-55.5648	-45.4598	-55.1993	-49.773
anatase101	sphere	20	5026.55	33510.3	0	-56.5576	-64.2537	-65.502	-55.492	-64.6061	-16.23	-20.1282	-47.4212	-37.3435	-32.36	-31.4851	-50.7623	-13.4336	-41.4159	-32.5732	-31.2435	-47.3434	-16.0795	-29.4545	-41.3021	-63.0631	-49.5233	-80.4092	-43.4713	-66.7481	-39.0655	-42.8401	-25.1849	-56.666	-72.3131	-45.8401	-54.7269	-81.7301	-43.6163	-44.2229	-16.9353	-56.6311	-42.4689	-53.7812	-52.885
anatase101	sphere	20	5026.55	33510.3	25	-54.3857	-68.177	-69.009	-57.9115	-61.0759	-13.6673	-17.3483	-51.2412	-36.7286	-32.6562	-30.4733	-52.3155	-12.6623	-40.5308	-30.6591	-32.3598	-48.9975	-15.2685	-33.4067	-40.4406	-63.0134	-53.5597	-80.6137	-43.5038	-68.8582	-37.7952	-41.2296	-25.4967	-60.9973	-77.7813	-48.3842	-53.2562	-80.2105	-44.9156	-41.2022	-16.8395	-57.6831	-44.5337	-50.9812	-54.914
anatase101	sphere	20	5026.55	33510.3	50	-52.1208	-75.2112	-72.5498	-59.4315	-59.4425	-10.7961	-14.1075	-54.4242	-35.9754	-33.2307	-31.4097	-52.142	-12.0724	-39.4762	-29.2974	-32.921	-52.0979	-14.5571	-36.2486	-42.1788	-63.9198	-60.4599	-79.6668	-42.3226	-71.9052	-36.7635	-40.2263	-25.7092	-67.2071	-84.4681	-53.9458	-52.5877	-77.4449	-46.387	-38.2306	-16.7427	-58.2225	-46.1231	-48.5324	-55.7026
anatase101	sphere	25	7853.98	65449.8	-50	-59.3352	-51.8525	-59.3134	-51.9002	-72.0794	-21.4451	-26.6867	-41.0839	-40.6703	-32.7833	-45.3634	-52.6213	-15.4296	-43.8095	-36.0494	-30.1367	-40.9651	-18.1524	-22.8784	-48.278	-65.7342	-24.7324	-78.8167	-48.8365	-64.8837	-42.4468	-46.1977	-25.3063	-54.3742	-58.1523	-43.519	-57.3645	-88.8351	-43.2249	-52.8073	-17.6045	-56.4558	-55.0733	-57.3369	-50.1691
anatase101	sphere	25	7853.98	65449.8	-25	-56.8011	-57.2233	-63.1281	-54.2079	-70.0877	-19.0478	-23.9268	-45.0454	-39.774	-33.007	-38.2672	-52.2044	-14.5857	-43.167	-35.5503	-31.1623	-45.2424	-17.1712	-26.7745	-45.7293	-65.7632	-30.6159	-79.7482	-47.1286	-69.2563	-41.0759	-44.4674	-25.457	-57.3212	-63.6994	-45.1779	-56.4726	-87.147	-44.6288	-49.419	-17.4784	-57.2515	-46.9838	-55.8331	-49.5896
anatase101	sphere	25	7853.98	65449.8	0	-55.1198	-61.0188	-66.7362	-56.3536	-67.5988	-16.5176	-20.7844	-48.5073	-39.0032	-33.0928	-32.1031	-54.1275	-13.6726	-41.9077	-33.9102	-31.7864	-47.788	-16.3302	-29.2899	-42.727	-65.5995	-40.8757	-79.7675	-45.3729	-69.4244	-39.9255	-43.142	-25.6598	-60.4863	-68.588	-46.7246	-53.744	-84.539	-44.6401	-45.4013	-17.3828	-57.6995	-43.4197	-53.23	-51.8865
anatase101	sphere	25	7853.98	65449.8	25	-53.9339	-66.3678	-70.0802	-58.0775	-65.7745	-13.8498	-17.967	-51.5687	-38.2027	-33.1584	-31.1587	-54.8076	-12.9616	-41.1064	-31.3146	-32.5749	-49.8577	-15.578	-33.5597	-41.0765	-65.3864	-46.0978	-79.4805	-44.0308	-73.1294	-38.7218	-41.7087	-25.9492	-64.0463	-74.9876	-49.3117	-52.9397	-80.3488	-45.9373	-41.8819	-17.247	-58.7012	-45.1296	-51.2306	-54.3288
anatase101	sphere	25	7853.98	65449.8	50	-52.287	-69.9069	-73.2193	-60.4481	-64.339	-10.9336	-14.7824	-55.5017	-37.4766	-34.0357	-31.8931	-55.0909	-12.2419	-39.9395	-29.6374	-33.175	-52.9571	-14.7832	-36.1927	-43.697	-67.0355	-55.4603	-80.0528	-43.4121	-75.4667	-37.3628	-40.8987	-26.2185	-68.8207	-79.241	-52.7301	-51.7712	-78.6921	-47.2503	-39.0002	-17.1621	-59.5711	-47.5252	-49.0864	-55.4777
anatase101	sphere	50	31415.9	523599	-50	-57.5336	-49.4179	-62.0523	-54.7561	-79.6228	-23.416	-28.2823	-41.8706	-44.5078	-34.0752	-46.8412	-54.7044	-16.1248	-45.8257	-38.0187	-30.6785	-45.241	-18.7661	-23.6332	-50.7057	-69.6921	-24.893	-78.5899	-51.9033	-72.7671	-44.2975	-47.0457	-26.3487	-62.6621	-60.3523	-46.9522	-56.9527	-90.8949	-45.5937	-54.7205	-18.5142	-59.7185	-58.0264	-58.6534	-51.7267
anatase101	sphere	50	31415.9	523599	-25	-57.9667	-53.991	-65.7619	-56.9894	-76.0688	-20.9314	-25.3367	-44.9342	-43.7011	-34.3385	-39.3682	-54.0946	-15.2454	-44.2561	-36.7059	-31.2427	-47.0016	-17.7424	-27.5702	-47.6374	-70.0061	-28.1917	-76.9072	-49.5826	-75.5997	-42.9163	-45.7	-26.4893	-65.9154	-66.2206	-48.5375	-55.7308	-88.0764	-45.3852	-50.264	-18.4059	-60.9821	-50.0083	-57.0709	-49.9477
anatase101	sphere	50	31415.9	523599	0	-54.9829	-59.0203	-69.3505	-58.9762	-73.7942	-18.3016	-22.576	-49.4947	-42.6272	-34.643	-33.1686	-55.5166	-14.3122	-43.3837	-35.1082	-32.2329	-49.819	-16.9364	-30.6474	-45.2421	-67.2896	-31.498	-77.4098	-47.7391	-78.7375	-41.7101	-43.931	-26.6377	-69.0826	-71.5493	-50.4048	-54.2677	-85.4511	-47.138	-46.527	-18.2753	-61.5265	-45.3398	-54.3372	-51.3321
anatase101	sphere	50	31415.9	523599	25	-53.1154	-63.2515	-73.1009	-61.417	-70.204	-15.5243	-19.5685	-51.4271	-41.622	-34.7987	-32.5826	-56.2389	-13.497	-42.4591	-33.0067	-32.8972	-52.4774	-16.1327	-34.0811	-44.7211	-67.1015	-35.576	-78.9301	-46.7707	-81.8957	-40.3233	-42.8608	-26.9172	-71.8395	-79.0678	-52.6483	-52.2142	-82.8406	-48.5151	-43.1226	-18.1538	-62.6368	-47.1982	-52.341	-53.291
anatase101	sphere	50	31415.9	523599	50	-49.8671	-66.8238	-76.2893	-62.9581	-67.7199	-12.5243	-16.3916	-55.2819	-40.6984	-35.5532	-33.0682	-58.622	-12.7561	-41.2458	-31.6205	-33.4564	-54.3073	-15.3816	-37.8043	-45.2167	-67.7858	-39.9755	-77.8302	-46.02	-84.0451	-39.0757	-41.8024	-27.1927	-75.9649	-85.4111	-53.8963	-52.2781	-80.1185	-50.2849	-39.5101	-18.0483	-63.0127	-49.1816	-49.745	-54.1286
anatase101	sphere	75	70685.8	1.76715e+06	-50	-57.3624	-45.7635	-62.6986	-55.6775	-80.9698	-24.3192	-29.045	-40.4471	-45.4122	-34.5818	-47.174	-55.1059	-16.3132	-46.3421	-37.4494	-30.7375	-45.4712	-18.974	-24.5393	-51.8168	-67.9053	-25.2713	-77.7993	-52.1397	-74.7173	-44.9375	-47.6957	-26.604	-66.3991	-61.3924	-47.8694	-55.8951	-92.7374	-43.8331	-54.2007	-18.8183	-61.8313	-59.6114	-59.0402	-52.1439
anatase101	sphere	75	70685.8	1.76715e+06	-25	-57.2335	-49.4597	-66.9273	-58.8254	-77.1587	-21.7667	-25.8877	-44.6996	-44.6948	-34.5968	-39.7976	-55.395	-15.3864	-44.9056	-36.7703	-31.6219	-47.6234	-18.0103	-28.2472	-48.9837	-67.9104	-28.8895	-78.4034	-50.2492	-78.1476	-43.6139	-45.6425	-26.8256	-69.6281	-67.4641	-50.2697	-55.2157	-88.0552	-45.6056	-51.6488	-18.6516	-62.2871	-51.671	-56.6868	-51.1059
anatase101	sphere	75	70685.8	1.76715e+06	0	-54.4082	-55.2313	-70.2763	-60.8474	-76.1953	-19.1922	-23.1905	-46.6858	-43.7242	-35.0955	-33.5996	-54.4597	-14.6256	-43.9136	-34.3729	-32.3137	-50.8279	-17.139	-31.2679	-46.7824	-68.8328	-32.2276	-77.4428	-48.6206	-79.5708	-42.2634	-43.7209	-27.0169	-72.3462	-73.0654	-51.5938	-54.3224	-85.1445	-47.5383	-46.705	-18.5485	-63.3681	-45.8845	-56.1976	-52.1139
anatase101	sphere	75	70685.8	1.76715e+06	25	-54.4963	-58.7926	-74.1872	-61.9681	-72.3793	-16.3733	-20.2783	-50.2994	-42.6949	-35.6388	-32.9019	-58.4689	-13.6727	-43.1189	-33.2696	-33.0364	-52.1079	-16.3222	-34.933	-46.0557	-67.4405	-35.841	-78.8605	-46.7945	-82.6062	-40.9967	-43.6359	-27.2451	-76.4367	-78.1718	-54.656	-54.4127	-81.9492	-48.9353	-43.406	-18.4267	-64.2926	-47.6751	-52.1862	-53.0888
anatase101	sphere	75	70685.8	1.76715e+06	50	-51.4659	-63.5245	-77.5168	-64.2865	-69.9589	-13.4168	-16.9733	-55.1703	-41.6748	-36.1715	-33.4979	-58.9236	-12.8301	-41.5954	-31.7354	-33.7667	-57.09	-15.5408	-37.9002	-47.1519	-66.677	-39.6484	-77.6968	-46.3735	-85.2262	-39.5988	-41.9987	-27.569	-78.6024	-83.4896	-55.1777	-50.7199	-79.6483	-50.6328	-39.8269	-18.3454	-64.8792	-49.8205	-49.0815	-55.9558
anatase101	sphere	100	125664	4.18879e+06	-50	-57.1959	-41.9306	-63.6331	-57.3539	-83.0261	-24.8812	-28.9545	-39.5537	-46.2951	-34.6893	-47.2871	-55.3631	-16.5056	-46.6402	-37.7215	-30.6689	-45.562	-19.12	-24.1826	-51.7821	-69.1265	-25.3282	-77.6545	-52.6224	-73.1457	-45.246	-47.3068	-26.9369	-68.3765	-66.4144	-49.2527	-56.5922	-90.3372	-44.5201	-54.8776	-18.9219	-62.096	-60.5849	-59.6033	-53.2948
anatase101	sphere	100	125664	4.18879e+06	-25	-55.7536	-47.5573	-67.268	-58.8962	-79.2338	-22.311	-26.2972	-43.6193	-45.2475	-34.8668	-40.0138	-55.3964	-15.533	-45.2337	-36.9038	-31.5283	-48.1735	-18.064	-27.5549	-48.8725	-68.9374	-28.7618	-78.853	-50.4678	-75.6605	-43.9692	-45.1373	-26.9924	-71.4131	-72.1351	-50.7047	-54.6113	-87.6818	-45.6572	-50.6153	-18.8095	-63.7341	-52.6478	-56.4421	-51.0936
anatase101	sphere	100	125664	4.18879e+06	0	-54.4421	-51.5129	-70.4897	-61.3267	-78.0805	-19.6125	-23.4533	-46.8741	-44.2922	-35.2479	-33.7584	-56.0582	-14.5927	-44.3813	-34.9769	-32.4597	-51.0121	-17.1795	-31.8019	-45.8172	-69.5086	-32.3454	-78.4114	-48.3034	-78.7457	-42.6125	-44.0228	-27.1848	-74.482	-77.2736	-53.4486	-53.4758	-85.2905	-47.0967	-48.1971	-18.6981	-64.1003	-46.1833	-54.2797	-52.0934
anatase101	sphere	100	125664	4.18879e+06	25	-53.8949	-55.7487	-74.5368	-63.8778	-74.2269	-16.8002	-20.3754	-49.467	-43.3682	-35.9257	-33.1471	-57.0722	-13.8082	-43.2053	-33.5023	-32.9574	-53.3026	-16.3954	-34.7062	-45.6928	-69.2863	-36.1348	-78.7532	-47.2737	-81.0928	-41.1975	-43.3917	-27.3992	-78.0146	-83.8194	-54.8671	-52.9967	-82.0426	-48.7591	-43.6382	-18.5899	-64.5537	-47.9561	-51.9445	-53.4212
anatase101	sphere	100	125664	4.18879e+06	50	-52.5563	-60.3931	-78.1907	-65.206	-73.5798	-13.8348	-17.2613	-53.6879	-42.334	-37.002	-33.7269	-56.9849	-13.0658	-41.9973	-31.2212	-34.0719	-56.9273	-15.6083	-37.4673	-49.0774	-67.4205	-39.612	-78.8037	-47.0386	-82.1541	-39.9873	-42.5706	-27.6844	-80.8392	-88.4866	-56.653	-50.9483	-79.3923	-51.0456	-40.4383	-18.4794	-65.8622	-49.8363	-49.5944	-55.3413
anatase101	sphere	150	282743	1.41372e+07	-50	-58.617	-40.8014	-63.998	-57.6732	-85.4637	-25.327	-29.4281	-39.4643	-47.0957	-34.9952	-47.6103	-54.7833	-16.5676	-46.866	-38.2549	-31.0959	-44.2509	-19.2581	-24.6039	-52.9236	-69.5703	-25.5518	-78.6974	-52.2693	-72.3671	-45.6993	-47.3169	-26.973	-70.1875	-71.0696	-48.8382	-55.151	-91.0077	-44.2208	-54.8983	-19.1029	-63.6741	-61.7452	-59.3492	-53.6455
anatase101	sphere	150	282743	1.41372e+07	-25	-56.4671	-44.5365	-68.2454	-60.2551	-82.9037	-22.9026	-26.5143	-42.8782	-45.8476	-35.0152	-39.9274	-54.6468	-15.6616	-45.7291	-36.1988	-31.6575	-48.9577	-18.2366	-28.2454	-49.0072	-69.3921	-29.0271	-79.4966	-50.8053	-73.9271	-44.2137	-45.8088	-27.1529	-73.4694	-77.2785	-52.0063	-53.3991	-88.3782	-45.6454	-51.5215	-18.9824	-64.1441	-53.1835	-57.0874	-50.7058
anatase101	sphere	150	282743	1.41372e+07	0	-54.1295	-49.0148	-71.8938	-63.0506	-80.0319	-20.1333	-23.7124	-46.421	-44.9358	-35.7045	-33.9652	-57.8051	-14.7657	-44.3795	-34.5621	-32.3555	-51.5903	-17.3375	-31.4209	-47.0029	-67.6641	-32.6337	-77.7325	-48.8887	-75.8829	-43.0114	-44.474	-27.3435	-77.5255	-83.8865	-53.468	-53.2235	-83.7652	-47.5878	-47.539	-18.8794	-65.0541	-46.682	-54.8072	-51.5426
anatase101	sphere	150	282743	1.41372e+07	25	-54.0691	-53.337	-75.1399	-64.5553	-77.872	-17.3981	-20.8048	-49.5258	-43.7532	-35.9715	-33.3884	-56.1152	-13.8676	-43.4878	-33.2515	-33.0205	-54.156	-16.4745	-34.5089	-46.6099	-71.8117	-36.3228	-79.1078	-47.0109	-78.6509	-41.5954	-42.9619	-27.5276	-79.9199	-88.97	-54.8606	-52.3482	-81.3989	-49.1322	-42.8046	-18.721	-65.8759	-48.2387	-52.3762	-53.6171
anatase101	sphere	150	282743	1.41372e+07	50	-51.0581	-59.6052	-78.4446	-65.7357	-74.7815	-14.3909	-17.7349	-53.7661	-42.5072	-36.8473	-33.9981	-56.7896	-13.0752	-42.1266	-31.704	-33.7546	-55.7385	-15.7171	-38.4592	-48.1184	-70.6538	-40.091	-80.7193	-47.9233	-82.5543	-40.2606	-42.9032	-27.8066	-83.4782	-93.9099	-56.9409	-52.8036	-80.3515	-50.8212	-39.8508	-18.6085	-66.7107	-50.1342	-49.1885	-56.3411
anatase101	sphere	200	502655	3.35103e+07	-50	-56.1134	-38.4191	-64.4168	-57.5835	-85.7776	-25.5855	-29.6616	-39.6195	-46.9867	-34.974	-47.393	-54.4795	-16.6239	-47.0553	-38.4622	-30.6257	-44.1613	-19.2203	-24.3931	-52.7155	-68.1713	-25.6039	-78.692	-52.3524	-69.6185	-45.845	-47.2126	-27.0586	-71.0768	-72.2942	-48.6616	-56.4101	-91.1373	-44.0075	-54.5881	-19.1917	-63.4184	-62.0895	-58.7298	-53.5781
anatase101	sphere	200	502655	3.35103e+07	-25	-54.8234	-43.7036	-67.61	-59.8429	-85.1708	-23.1043	-26.6649	-43.0901	-46.2003	-35.3736	-40.1175	-56.1362	-15.6821	-45.7064	-35.8147	-31.5366	-49.753	-18.298	-28.5786	-49.8394	-67.02	-29.1525	-79.2076	-50.3854	-74.0272	-44.4153	-45.4325	-27.2309	-74.4591	-77.9551	-51.6189	-56.8187	-88.1318	-45.6797	-51.0564	-19.0918	-64.7933	-54.2038	-57.1002	-50.7794
anatase101	sphere	200	502655	3.35103e+07	0	-53.8995	-47.7294	-71.5956	-63.2829	-80.4033	-20.5102	-23.7569	-46.3408	-44.9064	-35.6826	-34.18	-56.5311	-14.847	-44.5642	-34.5611	-31.975	-50.8986	-17.377	-31.5452	-46.9789	-68.5384	-32.7353	-79.765	-48.8685	-76.881	-43.1093	-44.4721	-27.4427	-78.0948	-85.6579	-53.9259	-53.2917	-84.932	-47.6231	-47.4544	-18.9155	-65.1284	-46.8461	-54.4262	-52.1087
anatase101	sphere	200	502655	3.35103e+07	25	-52.634	-52.9027	-75.2416	-64.7415	-77.4219	-17.5742	-20.8683	-51.138	-44.092	-36.3468	-33.6083	-57.2138	-13.9288	-43.7653	-33.5017	-32.8848	-54.2134	-16.5732	-34.4491	-45.315	-69.5547	-36.3968	-79.3161	-47.4488	-78.888	-41.6561	-43.5782	-27.6557	-80.9558	-90.7763	-55.5706	-55.2584	-82.9821	-49.2756	-43.2504	-18.8231	-65.932	-48.3751	-53.9749	-53.9695
anatase101	sphere	200	502655	3.35103e+07	50	-50.8801	-56.0091	-79.1693	-67.4742	-74.6594	-14.5889	-17.5658	-52.9835	-42.8419	-36.9067	-34.0828	-57.6637	-13.1121	-42.3075	-31.5942	-34.1699	-57.0412	-15.7865	-37.4362	-50.2882	-67.4068	-39.8621	-80.9773	-48.4808	-82.0654	-40.3024	-42.787	-27.8937	-84.7242	-94.7772	-56.6921	-52.3427	-79.7769	-50.6785	-39.866	-18.7245	-67.1951	-50.4105	-49.8183	-55.2453
rutile110	sphere	5	314.159	523.599	-50	-23.2598	-7.14369	-36.0488	-27.0517	-27.4807	-17.4636	-26.7294	-12.5303	-15.841	-11.5771	-39.2826	-31.4273	-9.53094	-29.562	-21.2113	-2.93724	-8.38224	-9.15403	-17.4628	-22.1963	-38.0106	-4.163	-22.12	-25.3911	-15.6838	-25.2314	-20.2503	-12.2273	-17.1106	-6.32208	-11.1036	-29.9716	-49.9852	-19.4568	-35.2147	-5.97676	-27.2567	-49.3724	-26.9972	-30.1996
rutile110	sphere	5	314.159	523.599	-25	-21.3799	-6.11455	-33.384	-25.5874	-25.01	-15.0498	-21.6208	-10.364	-13.8924	-10.6455	-32.7146	-27.2384	-8.50436	-25.2006	-19.6882	-3.10338	-8.24895	-7.68127	-15.4129	-20.1745	-35.9738	-5.97305	-20.5067	-22.4069	-16.0766	-22.5553	-17.7366	-11.8438	-20.6054	-5.90287	-11.6128	-25.6534	-42.5677	-17.7103	-31.3243	-5.39024	-25.8083	-42.7049	-23.3635	-26.902
rutile110	sphere	5	314.159	523.599	0	-19.4436	-5.84885	-30.6863	-23.1302	-23.57	-12.4872	-16.8544	-9.75197	-12.5746	-10.2963	-26.1412	-24.3248	-7.52786	-21.0428	-17.9158	-3.30561	-8.26367	-6.30738	-13.3012	-18.4939	-32.652	-8.27469	-19.5592	-19.3933	-16.7575	-19.8584	-15.2914	-11.5276	-23.5127	-6.5411	-12.6139	-21.1309	-37.656	-16.2867	-27.2938	-4.85211	-24.847	-35.8747	-20.2466	-24.2668
rutile110	sphere	5	314.159	523.599	25	-17.8558	-6.54001	-27.6274	-21.17	-23.992	-9.94152	-12.4088	-11.9115	-11.4808	-10.4163	-19.2584	-23.4145	-6.6438	-17.0061	-16.4017	-3.51807	-8.49546	-5.04905	-11.2001	-17.3186	-30.0276	-10.9889	-19.4109	-16.5811	-17.9618	-17.1733	-13.0336	-11.304	-26.6641	-8.36162	-14.9069	-16.8154	-33.9761	-15.5748	-22.9914	-4.36607	-24.9526	-28.7582	-17.6455	-24.2333
rutile110	sphere	5	314.159	523.599	50	-16.1205	-8.71246	-26.2418	-19.4074	-26.7399	-7.28837	-8.58044	-16.3534	-10.4159	-10.8999	-12.2584	-24.1772	-5.88418	-13.4266	-14.6861	-3.75658	-9.10382	-3.91598	-9.29461	-16.3904	-27.3976	-13.982	-19.8313	-13.8051	-19.4257	-14.3823	-11.0039	-11.0266	-29.2407	-11.5112	-19.5288	-13.4456	-30.2034	-14.965	-19.0121	-3.9455	-25.7348	-20.9223	-14.9676	-25.1215
rutile110	sphere	10	1256.64	4188.79	-50	-31.8816	-9.88688	-42.9711	-32.6348	-37.7623	-21.1123	-31.6533	-27.815	-22.3597	-15.2303	-45.7225	-40.498	-12.9007	-35.0915	-26.6714	-4.02229	-11.3215	-11.8948	-20.8658	-28.6222	-39.8855	-10.9503	-28.7121	-31.641	-27.1664	-31.9916	-25.1584	-16.4154	-18.5282	-9.8141	-15.4108	-33.6527	-57.6849	-25.0704	-39.9399	-7.96163	-37.3744	-63.8464	-31.4956	-39.6043
rutile110	sphere	10	1256.64	4188.79	-25	-30.1125	-8.81316	-40.7151	-31.268	-35.3001	-18.5171	-26.3354	-23.5115	-18.9951	-14.4047	-38.7062	-36.4645	-11.8196	-30.8582	-24.8552	-4.33562	-11.3168	-10.3142	-18.8174	-25.6999	-37.7126	-17.3537	-27.0609	-28.764	-28.2063	-29.0476	-22.4972	-16.2201	-20.9568	-10.4596	-16.2136	-29.4434	-52.6302	-23.4844	-35.9863	-7.38806	-35.8073	-56.1585	-28.9068	-35.5991
rutile110	sphere	10	1256.64	4188.79	0	-28.1074	-8.3463	-38.4645	-29.4272	-33.3951	-15.8869	-21.4922	-18.7389	-17.0975	-14.2797	-31.766	-33.5487	-10.7901	-26.8208	-23.1569	-4.6468	-11.4293	-8.78053	-16.7094	-23.5138	-36.571	-22.9486	-26.1399	-25.9375	-28.8351	-26.0351	-19.9153	-15.778	-23.5833	-13.1483	-17.4954	-25.0483	-49.5092	-22.3265	-31.8347	-6.8419	-35.4282	-48.4846	-26.4262	-34.2736
rutile110	sphere	10	1256.64	4188.79	25	-26.2027	-8.86892	-35.5625	-27.8249	-31.3548	-13.1536	-17.1029	-17.1384	-15.7484	-14.6617	-24.756	-34.5412	-9.7957	-22.9524	-21.2761	-5.01299	-11.7658	-7.26122	-14.5522	-21.8494	-34.9669	-28.2472	-25.8421	-23.0934	-29.9775	-23.0215	-17.4227	-15.6402	-27.5395	-18.9712	-19.6495	-21.3732	-46.7529	-22.1657	-27.5653	-6.3291	-35.9633	-40.9462	-24.0361	-34.7828
rutile110	sphere	10	1256.64	4188.79	50	-24.357	-11.0866	-35.238	-26.1496	-30.0139	-10.2166	-13.2459	-21.2971	-14.5491	-15.4269	-17.668	-35.4187	-8.88975	-19.3975	-19.4102	-5.41173	-12.4956	-5.85073	-12.3759	-20.6696	-32.7318	-35.0093	-25.8996	-20.3922	-30.9828	-19.7863	-15.0742	-15.2115	-34.3191	-27.079	-23.5241	-19.0078	-43.1172	-21.9081	-23.4294	-5.85577	-36.529	-33.0046	-21.729	-37.1447
rutile110	sphere	15	2827.43	14137.2	-50	-35.2362	-11.0049	-46.0312	-35.8299	-43.2192	-21.9704	-34.2824	-31.8357	-24.796	-16.572	-48.0071	-43.9402	-14.2363	-37.3853	-28.668	-4.32146	-12.475	-13.0095	-22.15	-31.3715	-41.7204	-11.8683	-31.7779	-34.2881	-29.8113	-34.5335	-26.9256	-17.9854	-19.7304	-10.8493	-17.3759	-34.9071	-58.1974	-26.9967	-41.1595	-8.63416	-41.2351	-70.8355	-34.2258	-43.1573
rutile110	sphere	15	2827.43	14137.2	-25	-33.8928	-10.0283	-43.9927	-34.4413	-40.8905	-19.341	-28.5903	-28.095	-21.1351	-15.7811	-40.921	-39.7632	-13.1542	-33.3065	-27.0164	-4.69951	-12.5398	-11.3817	-20.061	-28.2932	-40.6257	-14.9156	-30.0936	-31.4987	-30.9073	-31.4658	-24.2983	-17.7242	-21.9558	-12.4118	-18.4518	-30.5297	-52.9712	-25.0301	-37.305	-8.10571	-40.5662	-62.7651	-31.8852	-39.469
rutile110	sphere	15	2827.43	14137.2	0	-31.9832	-9.53769	-41.5249	-32.5694	-38.5008	-16.6448	-23.5687	-23.0664	-18.9473	-15.7388	-33.9274	-36.9213	-12.0886	-29.3505	-25.2093	-5.10605	-12.7165	-9.76663	-18.027	-25.6089	-38.8312	-19.3787	-29.1697	-28.6404	-31.7584	-28.5712	-21.6637	-17.5901	-24.4415	-17.5704	-19.7809	-26.3748	-50.0528	-24.1116	-32.9981	-7.58584	-39.8479	-54.5599	-29.5693	-36.7139
rutile110	sphere	15	2827.43	14137.2	25	-30.1535	-9.89896	-39.0413	-31.2551	-36.1752	-13.8685	-19.1008	-19.7308	-17.4357	-16.19	-26.8833	-38.0184	-11.0843	-25.6663	-23.3662	-5.51101	-13.0874	-8.20006	-15.8288	-23.7366	-37.507	-28.9442	-28.804	-25.8478	-32.5226	-25.2718	-19.0919	-17.2685	-28.6529	-24.8487	-21.6786	-22.9065	-47.3984	-23.7465	-28.6266	-7.08079	-39.9731	-46.8236	-27.132	-37.6817
rutile110	sphere	15	2827.43	14137.2	50	-28.1003	-12.0226	-38.0148	-29.4831	-33.9753	-10.979	-15.0784	-23.0389	-16.2247	-17.0207	-19.7577	-39.6731	-10.1484	-22.1803	-21.5481	-5.93214	-13.8293	-6.69642	-13.6032	-22.4847	-35.9204	-34.7081	-28.7111	-23.0772	-33.4161	-22.051	-16.6287	-16.956	-35.4935	-31.9095	-24.8163	-20.9633	-44.178	-24.1633	-24.633	-6.6141	-40.539	-38.7246	-24.9252	-39.9819
rutile110	sphere	20	5026.55	33510.3	-50	-37.3336	-11.5591	-47.4689	-37.4124	-47.1483	-22.7331	-35.7632	-31.8102	-25.435	-17.256	-49.2885	-46.1135	-14.9196	-38.7692	-29.7514	-4.43753	-13.1003	-13.5648	-22.8619	-32.9135	-41.9315	-12.2848	-33.536	-35.8883	-31.2135	-35.8772	-27.8932	-18.7923	-20.9789	-11.6173	-18.5642	-35.586	-58.6992	-26.0014	-41.8017	-8.98944	-44.2553	-74.7616	-35.7572	-45.061
rutile110	sphere	20	5026.55	33510.3	-25	-35.7196	-10.7625	-45.6123	-36.0062	-44.5061	-20.0278	-29.8687	-28.1013	-22.1073	-16.4805	-42.1754	-42.0687	-13.8366	-34.7537	-28.1245	-4.79645	-13.1822	-11.9426	-20.7721	-29.6155	-40.8003	-14.4675	-31.8717	-33.0129	-31.505	-32.7561	-25.2138	-18.5783	-23.4703	-13.9544	-19.6873	-31.114	-52.6876	-24.7401	-37.7097	-8.46039	-43.2218	-66.5771	-33.4185	-40.9916
rutile110	sphere	20	5026.55	33510.3	0	-33.8623	-10.2243	-43.226	-34.4392	-42.0273	-17.283	-24.7636	-23.46	-19.8262	-16.4604	-35.0576	-39.4173	-12.7842	-30.8873	-26.4003	-5.27158	-13.3963	-10.3141	-18.654	-26.8825	-39.0995	-18.073	-30.8232	-30.1956	-32.4876	-29.6646	-22.5847	-18.5002	-26.1332	-19.8098	-21.0566	-26.9094	-49.3077	-23.8323	-33.4657	-7.96368	-42.6732	-58.404	-31.0776	-38.0262
rutile110	sphere	20	5026.55	33510.3	25	-32.1474	-10.466	-40.9804	-32.858	-39.7461	-14.4581	-20.1878	-20.3631	-18.3555	-16.9965	-28.0075	-41.2581	-11.7336	-27.2402	-24.4401	-5.7121	-13.8319	-8.70108	-16.4697	-24.7483	-37.7399	-24.3203	-30.3212	-27.4328	-32.8646	-26.5608	-19.9361	-18.1036	-29.7605	-27.7271	-22.8388	-23.3381	-46.959	-24.1715	-29.1359	-7.47516	-42.4578	-50.1453	-28.6982	-38.6446
rutile110	sphere	20	5026.55	33510.3	50	-30.411	-12.3937	-39.3205	-31.1613	-37.4262	-11.505	-16.0251	-23.986	-17.2758	-17.8732	-20.9524	-41.6901	-10.7855	-23.7777	-22.4876	-6.2078	-14.5809	-7.13019	-14.3086	-23.3816	-37.0426	-34.1042	-30.194	-24.6663	-34.2771	-23.0754	-17.4538	-17.878	-35.4441	-34.6361	-25.3744	-21.1789	-43.8292	-24.3446	-25.1806	-7.01334	-42.6033	-41.9499	-26.5867	-40.8116
rutile110	sphere	25	7853.98	65449.8	-50	-38.4028	-11.9355	-48.5203	-38.287	-49.6976	-23.2401	-36.6273	-31.7349	-26.1869	-17.6453	-50.082	-47.6689	-15.3596	-39.6106	-30.657	-4.4874	-13.4715	-13.9247	-23.2764	-33.5612	-41.996	-12.5596	-34.5134	-36.7899	-32.6403	-36.9769	-28.5002	-19.2385	-21.9856	-12.2035	-19.2415	-35.8498	-58.9526	-25.5911	-42.1121	-9.17788	-45.7509	-77.3484	-36.8136	-46.4458
rutile110	sphere	25	7853.98	65449.8	-25	-36.596	-11.1084	-46.5046	-37.1638	-46.8384	-20.4927	-30.7933	-27.5613	-22.4911	-16.9073	-42.8661	-43.0119	-14.2434	-35.6599	-28.5849	-4.89622	-13.5743	-12.3026	-21.2026	-30.4458	-40.5806	-15.2581	-32.7922	-33.9714	-32.4414	-33.6058	-25.7882	-18.9995	-24.704	-15.369	-20.4369	-31.5264	-52.3995	-24.0691	-38.0292	-8.66829	-45.0497	-68.8606	-34.3961	-42.5427
rutile110	sphere	25	7853.98	65449.8	0	-35.1244	-10.725	-44.3164	-35.6968	-44.1127	-17.7204	-25.4016	-23.2838	-20.3746	-16.8612	-35.7675	-40.3894	-13.1975	-31.9261	-26.7993	-5.38864	-13.8247	-10.6415	-19.0939	-27.5992	-38.9529	-17.748	-31.8235	-31.1339	-33.0764	-30.6739	-23.0879	-18.8615	-27.5162	-22.0207	-21.7146	-27.2277	-48.9364	-23.9766	-33.7849	-8.19402	-44.8142	-60.3859	-32.0556	-38.9189
rutile110	sphere	25	7853.98	65449.8	25	-33.1415	-10.9379	-42.0087	-33.8479	-41.4746	-14.8864	-20.7543	-20.8688	-19.0653	-17.4531	-28.7603	-41.3066	-12.1664	-28.3605	-24.9186	-5.81917	-14.2493	-9.02019	-16.8987	-25.4189	-38.2797	-23.1115	-31.2501	-28.2783	-33.4677	-27.166	-20.475	-18.6499	-30.9989	-30.158	-23.6004	-23.8666	-46.3858	-24.1694	-29.4027	-7.70924	-44.3663	-52.3698	-29.7871	-38.7397
rutile110	sphere	25	7853.98	65449.8	50	-31.5008	-12.7339	-39.9331	-32.4711	-39.061	-11.9105	-16.743	-24.333	-17.9331	-18.3941	-21.6046	-43.1847	-11.1987	-24.8681	-23.0958	-6.33962	-15.0579	-7.4264	-14.7028	-24.0023	-37.6432	-32.255	-31.0696	-25.5746	-33.926	-23.7911	-17.931	-18.5332	-36.0345	-36.9001	-25.8749	-21.644	-43.294	-24.423	-25.5701	-7.25832	-44.5434	-44.0742	-27.1754	-41.6813
rutile110	sphere	50	31415.9	523599	-50	-40.1847	-12.846	-50.3485	-40.563	-56.9515	-24.3817	-38.2258	-31.4896	-26.5727	-18.5277	-51.7012	-49.8156	-16.256	-41.6526	-32.1304	-4.51042	-14.2738	-14.6968	-24.1103	-35.6387	-41.4847	-13.7822	-36.9852	-38.7882	-42.8181	-38.3148	-29.6169	-20.3774	-25.5022	-13.7977	-20.9758	-36.6281	-60.373	-23.8395	-42.7679	-9.58126	-50.221	-82.9319	-38.3012	-49.1053
rutile110	sphere	50	31415.9	523599	-25	-38.7749	-12.1684	-48.3219	-39.0934	-53.9494	-21.5653	-32.1336	-27.6705	-23.8377	-17.7595	-44.3871	-45.2192	-15.1369	-37.8813	-30.1719	-4.96791	-14.4368	-13.0168	-22.062	-32.1744	-39.706	-16.1905	-35.29	-35.9494	-42.4097	-35.2683	-26.9177	-20.28	-28.528	-17.3355	-22.1539	-32.1101	-51.9505	-22.8108	-38.6312	-9.10877	-49.1226	-74.0166	-36.1362	-45.0196
rutile110	sphere	50	31415.9	523599	0	-36.9064	-11.7288	-46.6835	-37.8018	-51.0747	-18.7487	-26.63	-23.3835	-22.0418	-17.7812	-37.2396	-41.6289	-14.051	-34.2388	-28.4068	-5.44756	-14.7129	-11.3344	-19.916	-29.1641	-39.237	-18.571	-34.2544	-33.0891	-41.7863	-32.1821	-24.2027	-19.9357	-31.5281	-23.0873	-23.5048	-27.854	-47.4508	-22.4678	-34.2822	-8.6354	-48.909	-65.4613	-33.5711	-40.4968
rutile110	sphere	50	31415.9	523599	25	-35.6685	-11.8296	-44.1992	-36.5497	-48.2062	-15.8288	-22.0552	-21.3799	-20.6876	-18.3738	-30.1666	-41.497	-13.0027	-30.7548	-26.3021	-5.97319	-15.1847	-9.6738	-17.7995	-26.8418	-38.5566	-21.1256	-33.6164	-30.3104	-41.8911	-28.6529	-21.5347	-19.7993	-34.8558	-30.4263	-25.0648	-24.4685	-45.0074	-23.2033	-30.1255	-8.19057	-48.4842	-56.8687	-31.1123	-39.5377
rutile110	sphere	50	31415.9	523599	50	-33.869	-13.4239	-41.5076	-34.7195	-45.2557	-12.7887	-18.0493	-25.1586	-19.3861	-19.4736	-23.0847	-43.6233	-12.0068	-27.3842	-24.3329	-6.49819	-16.0441	-8.03187	-15.571	-25.1562	-38.8617	-25.5207	-33.2127	-27.5182	-42.3539	-25.2509	-18.9932	-19.6348	-39.2837	-37.8487	-26.956	-22.0466	-42.2451	-23.7852	-26.2569	-7.75378	-48.2774	-48.1487	-28.5111	-42.0317
rutile110	sphere	75	70685.8	1.76715e+06	-50	-40.7507	-13.1738	-50.8061	-41.07	-59.5242	-24.7645	-38.9478	-31.4654	-27.0177	-18.8542	-52.2394	-51.0603	-16.5823	-42.3185	-32.9475	-4.55942	-14.5577	-14.9501	-24.4285	-36.4104	-41.2479	-13.9489	-37.6334	-39.4812	-45.1753	-38.8873	-30.0047	-20.6753	-27.1011	-14.6565	-21.711	-36.8194	-60.8665	-22.5814	-42.9518	-9.7051	-51.037	-84.9143	-38.8183	-50.053
rutile110	sphere	75	70685.8	1.76715e+06	-25	-39.2261	-12.5856	-48.6453	-39.736	-56.366	-21.9529	-32.9374	-27.6142	-24.516	-18.0464	-44.8695	-46.0548	-15.4546	-38.6673	-30.8058	-5.02155	-14.7144	-13.2888	-22.342	-32.7905	-40.1538	-16.3164	-36.2402	-36.5973	-44.9429	-35.5856	-27.2798	-20.5784	-30.2616	-18.6817	-22.7578	-32.3445	-52.1318	-22.0886	-38.7538	-9.2443	-50.4018	-76.0074	-36.497	-45.7369
rutile110	sphere	75	70685.8	1.76715e+06	0	-37.641	-12.0975	-46.7695	-38.5719	-53.5082	-19.0787	-27.343	-23.6725	-22.5831	-18.0538	-37.7078	-41.9014	-14.3659	-35.1023	-28.8608	-5.4919	-15.0389	-11.6082	-20.2455	-29.705	-39.227	-18.7582	-35.1295	-33.7743	-45.2579	-32.3582	-24.5842	-20.4318	-33.3337	-24.244	-24.254	-28.0778	-46.9778	-22.1007	-34.6657	-8.7866	-50.0244	-67.001	-34.2042	-41.4851
rutile110	sphere	75	70685.8	1.76715e+06	25	-36.3114	-12.1029	-44.6421	-37.0121	-50.6784	-16.181	-22.512	-21.6173	-21.2629	-18.7006	-30.6376	-42.1202	-13.2858	-31.6234	-26.8669	-6.0062	-15.51	-9.90498	-18.064	-27.1963	-39.0758	-21.4779	-34.4872	-30.9675	-45.0185	-29.2053	-21.8608	-20.1108	-36.6514	-31.2271	-25.829	-24.4576	-44.5781	-22.647	-30.2357	-8.34609	-49.5576	-58.3597	-31.4662	-39.7061
rutile110	sphere	75	70685.8	1.76715e+06	50	-34.6093	-13.6451	-42.5071	-35.34	-47.8163	-13.1042	-18.4731	-25.4115	-19.8644	-19.6875	-23.6141	-42.9164	-12.2905	-28.209	-24.8199	-6.54326	-16.384	-8.23041	-15.8599	-25.5564	-39.8069	-25.0664	-34.0497	-28.1089	-44.7324	-25.8081	-19.3108	-20.0095	-40.6788	-38.9558	-27.4818	-22.1275	-41.5753	-23.081	-26.4022	-7.92047	-49.448	-49.7537	-29.1645	-41.7507
rutile110	sphere	100	125664	4.18879e+06	-50	-41.1379	-13.3636	-50.9224	-41.6691	-60.8813	-24.9532	-39.1542	-31.1342	-27.2968	-18.98	-52.4615	-51.5286	-16.7391	-42.7276	-32.6884	-4.53004	-14.688	-15.1189	-24.5532	-36.4915	-41.1197	-14.0586	-38.1287	-39.7713	-47.4387	-39.3179	-30.1904	-21.0246	-27.9554	-15.0631	-21.9596	-36.9595	-61.3914	-22.5739	-42.9866	-9.77711	-52.0207	-85.8159	-39.2072	-50.3696
rutile110	sphere	100	125664	4.18879e+06	-25	-39.7099	-12.7455	-49.1345	-40.2152	-57.6092	-22.1314	-33.112	-27.2578	-24.5397	-18.266	-45.1516	-46.8832	-15.6102	-39.0318	-30.9811	-5.0102	-14.8892	-13.4126	-22.4652	-32.9228	-39.9675	-16.2185	-36.6773	-36.9726	-47.597	-35.9233	-27.4613	-20.8379	-31.1775	-19.2167	-23.1184	-32.4541	-52.263	-21.8838	-38.912	-9.32359	-50.898	-76.9638	-36.5203	-46.1335
rutile110	sphere	100	125664	4.18879e+06	0	-38.0561	-12.3196	-47.0751	-38.9038	-54.6947	-19.2606	-27.5123	-23.4593	-23.0098	-18.1998	-37.9516	-41.7772	-14.5022	-35.4674	-29.0648	-5.54236	-15.1779	-11.7088	-20.4411	-29.9323	-39.2894	-18.8022	-35.5761	-34.0898	-47.1665	-32.5043	-24.7594	-20.5902	-34.3844	-24.9698	-24.4792	-28.1444	-46.8985	-21.7536	-34.7941	-8.87136	-50.5938	-68.1455	-34.2301	-41.7198
rutile110	sphere	100	125664	4.18879e+06	25	-36.4093	-12.3077	-45.2814	-37.4974	-51.6343	-16.3203	-22.8138	-21.8378	-21.4521	-18.8749	-30.835	-40.3494	-13.4363	-32.1168	-26.8515	-6.05967	-15.6841	-10.0187	-18.238	-27.5008	-39.1659	-21.6642	-34.961	-31.2302	-47.9607	-29.4412	-22.0637	-20.3969	-37.6595	-31.7756	-26.0161	-24.4951	-44.0142	-22.3335	-30.3619	-8.43424	-50.5735	-59.3472	-31.6398	-40.4743
rutile110	sphere	100	125664	4.18879e+06	50	-34.6733	-13.7801	-42.7359	-35.7691	-48.8463	-13.2411	-18.6601	-25.3551	-20.1787	-19.9006	-23.9113	-42.8655	-12.4379	-28.6634	-25.0036	-6.58187	-16.5541	-8.34225	-15.9851	-25.7418	-40.206	-25.2724	-34.4219	-28.4422	-47.214	-26.2468	-19.5049	-20.3295	-41.6375	-39.5925	-27.8418	-22.289	-41.62	-23.0898	-26.4199	-7.99977	-50.6317	-50.8191	-28.8993	-41.9942
rutile110	sphere	150	282743	1.41372e+07	-50	-41.4212	-13.5331	-51.2287	-41.8011	-61.8599	-25.156	-39.5966	-30.8655	-27.5766	-19.1353	-52.8078	-51.6306	-16.9055	-43.0789	-33.0886	-4.56899	-14.8214	-15.2172	-24.7108	-36.6664	-41.1214	-13.6828	-38.4979	-40.216	-48.3062	-39.5453	-30.3724	-21.1274	-28.8634	-15.6643	-22.3717	-36.9811	-61.6215	-21.9541	-42.9973	-9.8575	-52.1728	-87.0689	-39.4461	-51.4018
rutile110	sphere	150	282743	1.41372e+07	-25	-39.7117	-12.9026	-49.5394	-40.595	-58.7768	-22.3283	-33.3164	-27.3755	-24.7417	-18.2884	-45.415	-46.8671	-15.7742	-39.4301	-31.2655	-5.05072	-15.0326	-13.5414	-22.6748	-33.1839	-39.8094	-16.3361	-37.1028	-37.3294	-48.3099	-36.0572	-27.6526	-21.0332	-32.0932	-19.95	-23.4745	-32.5745	-52.5543	-21.7958	-38.9692	-9.37907	-51.6416	-78.2265	-36.8953	-46.7451
rutile110	sphere	150	282743	1.41372e+07	0	-38.4034	-12.4697	-47.5652	-39.2306	-55.7838	-19.406	-27.6711	-23.4956	-23.0779	-18.3941	-38.288	-42.152	-14.6612	-35.9313	-29.3983	-5.5314	-15.3304	-11.8396	-20.57	-30.1412	-39.3041	-18.9633	-36.0828	-34.4191	-48.1711	-32.9199	-24.9284	-20.8189	-35.4608	-25.8022	-24.8184	-28.2211	-46.5755	-21.5435	-34.8278	-8.93493	-51.1399	-68.9173	-34.6359	-42.2439
rutile110	sphere	150	282743	1.41372e+07	25	-36.7241	-12.5419	-45.4572	-37.7579	-52.8214	-16.4784	-22.9822	-21.784	-21.6357	-19.0773	-31.1484	-40.5481	-13.5979	-32.5223	-27.1172	-6.06008	-15.8516	-10.1247	-18.4171	-27.5963	-39.4943	-21.7469	-35.252	-31.6399	-48.9733	-29.7082	-22.2473	-20.6507	-38.7428	-32.4231	-26.4533	-24.5631	-43.8579	-22.1612	-30.464	-8.51401	-51.0759	-60.3691	-31.9151	-39.8663
rutile110	sphere	150	282743	1.41372e+07	50	-35.1628	-13.881	-43.3073	-36.3364	-49.7434	-13.3553	-18.8962	-25.3582	-20.2478	-20.0803	-24.1231	-42.2459	-12.5839	-29.0517	-25.1897	-6.60848	-16.724	-8.46571	-16.1457	-26.0761	-40.6042	-24.8941	-34.8621	-28.7773	-47.6618	-26.3284	-19.6866	-20.4265	-42.5772	-40.4761	-27.9651	-22.0959	-41.2642	-22.2241	-26.6738	-8.08807	-51.0111	-51.6484	-29.3638	-42.6001
rutile110	sphere	200	502655	3.35103e+07	-50	-41.5597	-13.6216	-51.3891	-41.9948	-62.4218	-25.2435	-39.6597	-31.0187	-27.5025	-19.2026	-52.9396	-52.0547	-16.9954	-43.3037	-33.0916	-4.54763	-14.8897	-15.2705	-24.7671	-37.2009	-41.2687	-13.9467	-38.7347	-40.3099	-47.4268	-39.7225	-30.4784	-21.2608	-29.2904	-15.8474	-22.5987	-37.0735	-61.7635	-22.0083	-43.1625	-9.88148	-52.8201	-87.3475	-39.3818	-51.0368
rutile110	sphere	200	502655	3.35103e+07	-25	-40.1593	-13.0399	-49.8586	-40.725	-59.4361	-22.4137	-33.2958	-27.5561	-24.7397	-18.4014	-45.5017	-46.8298	-15.8497	-39.6548	-31.2485	-5.04057	-15.0792	-13.5947	-22.717	-33.3689	-40.166	-16.1539	-37.3738	-37.4648	-48.3301	-36.3195	-27.7867	-21.0459	-32.6357	-20.2896	-23.7028	-32.5989	-52.5695	-21.4462	-39.1195	-9.41886	-52.5642	-78.3961	-36.7063	-46.7946
rutile110	sphere	200	502655	3.35103e+07	0	-38.5529	-12.5535	-47.8743	-39.3701	-56.2718	-19.5287	-27.899	-23.5503	-23.2239	-18.4538	-38.3594	-42.0176	-14.7627	-36.1401	-29.5777	-5.51951	-15.4215	-11.8746	-20.6405	-30.2489	-39.4379	-19.2795	-36.3869	-34.6006	-47.5572	-33.0204	-25.0775	-20.8672	-35.9168	-26.1539	-24.9866	-28.2551	-46.4549	-21.2923	-34.872	-8.9871	-51.4919	-69.5217	-34.6178	-42.3642
rutile110	sphere	200	502655	3.35103e+07	25	-36.8727	-12.5881	-45.6276	-37.8475	-53.2621	-16.5746	-23.0046	-21.7504	-21.7936	-19.1378	-31.2845	-40.3059	-13.6678	-32.6947	-27.4401	-6.07777	-15.9476	-10.2268	-18.4644	-27.7192	-39.5708	-21.6765	-35.639	-31.8215	-48.722	-29.6977	-22.3374	-20.8382	-39.2844	-32.8864	-26.5343	-24.5796	-43.6591	-21.8748	-30.5307	-8.55897	-51.5059	-60.9113	-32.0849	-39.9736
rutile110	sphere	200	502655	3.35103e+07	50	-35.2637	-13.9537	-43.5229	-36.3809	-50.0902	-13.459	-19.0544	-25.3928	-20.5304	-20.099	-24.3212	-41.9844	-12.6215	-29.3018	-25.3003	-6.62361	-16.8018	-8.49421	-16.2113	-26.1151	-40.5886	-24.9375	-35.0363	-28.8814	-48.7671	-26.5204	-19.7614	-20.5476	-43.1167	-41.0434	-28.3564	-22.0716	-41.0289	-22.3539	-26.6242	-8.12994	-51.5354	-51.7784	-29.2211	-41.9831
